# Supplementary material for: Pre-Pregnancy Weight and Symptoms of Attention Deficit Hyperactivity Disorder and Executive Functioning Behaviors in Preschool Children
Source: MDPI journal article supplement (doi:10.3390/ijerph16040667), 2019-02-25
Supplement: s1 [file s1]

**Supplementary Table S1. Association between pre-pregnancy BMI, gestational weight gain, and childhood BASC ADHD symptoms among children born at 37 weeks gestation or greater (n=296).**

| Model                                     | ADHD        |             |             |              | Hyperactivity |             |             |             | Attention Problem |             |             |              |
|-------------------------------------------|-------------|-------------|-------------|--------------|---------------|-------------|-------------|-------------|-------------------|-------------|-------------|--------------|
|                                           | <i>B</i>    | <i>se</i>   | $\beta$     | <i>p</i>     | <i>B</i>      | <i>se</i>   | $\beta$     | <i>p</i>    | <i>B</i>          | <i>se</i>   | $\beta$     | <i>p</i>     |
| <b>Model 1</b>                            |             |             |             |              |               |             |             |             |                   |             |             |              |
| BMI (continuous)                          | <b>0.17</b> | <b>0.05</b> | <b>0.21</b> | <b>0.002</b> | <b>0.10</b>   | <b>0.04</b> | <b>0.17</b> | <b>0.02</b> | <b>0.07</b>       | <b>0.02</b> | <b>0.20</b> | <b>0.001</b> |
| <b>Model 2</b>                            |             |             |             |              |               |             |             |             |                   |             |             |              |
| BMI (categorical)                         |             |             |             |              |               |             |             |             |                   |             |             |              |
| 0 - 24.9 (referent)                       |             |             |             |              |               |             |             |             |                   |             |             |              |
| 25 - 29.9                                 | 0.10        | 1.14        | 0.01        | 0.93         | -0.36         | 0.90        | -0.03       | 0.69        | 0.51              | 0.44        | 0.06        | 0.24         |
| 30 - 34.9                                 | -0.07       | 1.03        | -0.002      | 0.95         | -0.16         | 0.72        | -0.01       | 0.83        | 0.10              | 0.58        | 0.01        | 0.87         |
| > 35                                      | <b>4.43</b> | <b>1.40</b> | <b>0.22</b> | <b>0.002</b> | <b>2.62</b>   | <b>1.10</b> | <b>0.19</b> | <b>0.02</b> | <b>1.80</b>       | <b>0.53</b> | <b>0.20</b> | <b>0.001</b> |
| <b>Model 3</b>                            |             |             |             |              |               |             |             |             |                   |             |             |              |
| Gestational weight gain (kg) (continuous) | -0.004      | 0.06        | -0.004      | 0.95         | -0.03         | 0.04        | -0.05       | 0.47        | 0.03              | 0.03        | 0.06        | 0.34         |
| <b>Model 4</b>                            |             |             |             |              |               |             |             |             |                   |             |             |              |
| Gestational weight gain (categorical)     |             |             |             |              |               |             |             |             |                   |             |             |              |
| Less than adequate                        | <b>2.89</b> | <b>1.33</b> | <b>0.16</b> | <b>0.03</b>  | <b>2.10</b>   | <b>0.95</b> | <b>0.16</b> | <b>0.03</b> | 0.80              | 0.61        | 0.10        | 0.19         |
| Adequate (referent)                       |             |             |             |              |               |             |             |             |                   |             |             |              |
| More than adequate                        | 1.12        | 0.93        | 0.08        | 0.23         | 0.45          | 0.65        | 0.04        | 0.49        | 0.67              | 0.39        | 0.10        | 0.09         |

B: unstandardized regression coefficient; *se*: robust standard error;  $\beta$ : standardized coefficient; *p*: p-value; Models 1 and 2 adjusted for gestational diabetes, parity, birth weight, child's age, sex, mother's age, race, education, gestational weeks, smoking and mother's concurrent ADHD; Models 3 and 4 adjusted for pre-pregnancy BMI, parity, birth weight, child's age, sex, mom's age, race, education, gestational weeks, smoking and mother's ADHD.
