# Supplementary material for: Pre-Pregnancy Weight and Symptoms of Attention Deficit Hyperactivity Disorder and Executive Functioning Behaviors in Preschool Children
Source: MDPI journal article supplement (doi:10.3390/ijerph16040667), 2019-02-25
Supplement: s1 [file s1]

**Supplementary Table S2. Association between pre-pregnancy BMI, gestational weight gain, and childhood BRIEF GEC score among children born at 37 weeks gestation or greater (n=296).**

| Model                                      | GEC score   |             |             |             | Inhibit     |             |             |             | Shift       |             |             |             | Emotional Control |           |         |          | Working Memory |             |             |             | Plan/Organize |             |             |              |
|--------------------------------------------|-------------|-------------|-------------|-------------|-------------|-------------|-------------|-------------|-------------|-------------|-------------|-------------|-------------------|-----------|---------|----------|----------------|-------------|-------------|-------------|---------------|-------------|-------------|--------------|
|                                            | <i>B</i>    | <i>se</i>   | $\beta$     | <i>p</i>    | <i>B</i>    | <i>se</i>   | $\beta$     | <i>p</i>    | <i>B</i>    | <i>se</i>   | $\beta$     | <i>p</i>    | <i>B</i>          | <i>se</i> | $\beta$ | <i>p</i> | <i>B</i>       | <i>se</i>   | $\beta$     | <i>p</i>    | <i>B</i>      | <i>se</i>   | $\beta$     | <i>p</i>     |
| <b>Model 1</b>                             |             |             |             |             |             |             |             |             |             |             |             |             |                   |           |         |          |                |             |             |             |               |             |             |              |
| BMI (continuous)                           | <b>0.40</b> | <b>0.17</b> | <b>0.17</b> | <b>0.02</b> | <b>0.10</b> | <b>0.05</b> | <b>0.14</b> | <b>0.04</b> | <b>0.06</b> | <b>0.03</b> | <b>0.15</b> | <b>0.04</b> | 0.04              | 0.03      | 0.09    | 0.20     | <b>0.12</b>    | <b>0.05</b> | <b>0.18</b> | <b>0.02</b> | <b>0.07</b>   | <b>0.03</b> | <b>0.18</b> | <b>0.004</b> |
| <b>Model 2</b>                             |             |             |             |             |             |             |             |             |             |             |             |             |                   |           |         |          |                |             |             |             |               |             |             |              |
| BMI (categorical)                          |             |             |             |             |             |             |             |             |             |             |             |             |                   |           |         |          |                |             |             |             |               |             |             |              |
| 0 - 24.9 (referent)                        |             |             |             |             |             |             |             |             |             |             |             |             |                   |           |         |          |                |             |             |             |               |             |             |              |
| 25 - 29.9                                  | 0.38        | 3.05        | 0.01        | 0.90        | 0.01        | 1.01        | 0.001       | 0.99        | 0.26        | 0.46        | 0.03        | 0.56        | -0.39             | 0.53      | -0.04   | 0.46     | 0.44           | 1.01        | 0.03        | 0.67        | -0.07         | 0.54        | -0.01       | 0.90         |
| 30 - 34.9                                  | -0.99       | 3.74        | -0.01       | 0.79        | -0.69       | 1.08        | -0.03       | 0.53        | -0.68       | 0.64        | -0.06       | 0.29        | -0.57             | 0.91      | -0.04   | 0.53     | 0.43           | 1.05        | 0.02        | 0.68        | 0.40          | 0.66        | 0.03        | 0.54         |
| > 35                                       | <b>9.81</b> | <b>4.45</b> | <b>0.17</b> | <b>0.03</b> | 2.43        | 1.19        | 0.14        | 0.04        | 1.36        | 0.72        | 0.14        | 0.06        | 1.13              | 0.80      | 0.10    | 0.16     | <b>3.31</b>    | <b>1.40</b> | <b>0.20</b> | <b>0.02</b> | <b>1.58</b>   | <b>0.71</b> | <b>0.16</b> | <b>0.03</b>  |
| <b>Model 3</b>                             |             |             |             |             |             |             |             |             |             |             |             |             |                   |           |         |          |                |             |             |             |               |             |             |              |
| Gestational weight gain (kg) (continuous)  | 0.20        | 0.15        | 0.08        | 0.18        | 0.04        | 0.05        | 0.05        | 0.39        | 0.02        | 0.02        | 0.05        | 0.38        | 0.02              | 0.03      | 0.04    | 0.56     | 0.06           | 0.04        | 0.08        | 0.16        | <b>0.05</b>   | <b>0.03</b> | <b>0.11</b> | <b>0.04</b>  |
| <b>Model 4</b>                             |             |             |             |             |             |             |             |             |             |             |             |             |                   |           |         |          |                |             |             |             |               |             |             |              |
| Gestational weight gain (kg) (categorical) |             |             |             |             |             |             |             |             |             |             |             |             |                   |           |         |          |                |             |             |             |               |             |             |              |
| Less than adequate                         | 2.13        | 4.07        | 0.04        | 0.60        | 1.04        | 1.13        | 0.07        | 0.36        | 0.40        | 0.65        | 0.05        | 0.54        | 0.81              | 0.77      | 0.08    | 0.29     | -0.004         | 1.21        | -0.00       | 1.00        | -0.62         | 0.70        | -0.07       | 0.38         |
| Adequate (referent)                        |             |             |             |             |             |             |             |             |             |             |             |             |                   |           |         |          |                |             |             |             |               |             |             |              |
| More than adequate                         | 2.49        | 3.08        | 0.06        | 0.42        | 0.75        | 0.85        | 0.06        | 0.38        | 0.40        | 0.49        | 0.06        | 0.41        | 0.33              | 0.57      | 0.04    | 0.57     | 0.30           | 0.91        | 0.02        | 0.74        | 0.14          | 0.52        | 0.02        | 0.79         |

B: unstandardized regression coefficient; **se**: robust standard error; **β**: standardized coefficient; **p**: p-value; Models 1 and 2 adjusted for gestational diabetes, parity, birth weight, child's age, sex, mother's age, race, education, gestational weeks, smoking and mother's concurrent ADHD; Models 3 and 4 adjusted for pre-pregnancy BMI, parity, birth weight, child's age, sex, mom's age, race, education, gestational weeks, smoking and mother's ADHD.
